# Supplementary material for: Two decades of satellite observations of AOD over mainland China using ATSR-2, AATSR and MODIS/Terra: data set evaluation and large-scale patterns
Source: Copernicus journal article supplement (doi:10.5194/acp-18-1573-2018), 2018-02-05
Supplement: Supplementary file 1 [file acp-18-1573-2018-supplement.pdf]

Supplement of Atmos. Chem. Phys., 18, 1573–1592, 2018  
<https://doi.org/10.5194/acp-18-1573-2018-supplement>  
© Author(s) 2018. This work is distributed under  
the Creative Commons Attribution 4.0 License.

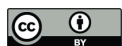

*Supplement of*

## **Two decades of satellite observations of AOD over mainland China using ATSR-2, AATSR and MODIS/Terra: data set evaluation and large-scale patterns**

**Gerrit de Leeuw et al.**

*Correspondence to:* Gerrit de Leeuw ([gerrit.leeuw@fmi.fi](mailto:gerrit.leeuw@fmi.fi))

The copyright of individual parts of the supplement might differ from the CC BY 4.0 License.

Table S1. AERONET sites used in this study

| <i><b>AERONET<br/>name station</b></i> | <i><b>Latitude</b></i> | <i><b>Longitude</b></i> | <i><b>Measurements days (2002-<br/>2012)</b></i>                                                                                                                            |
|----------------------------------------|------------------------|-------------------------|-----------------------------------------------------------------------------------------------------------------------------------------------------------------------------|
| BackGarden_GZ                          | 23,3                   | 113,0                   | 2006/06/22-2006/07/27                                                                                                                                                       |
| Beijing                                | 40,0                   | 116,4                   | 2002/04/23-2012/12/31                                                                                                                                                       |
| Chao_Jou                               | 22,5                   | 120,5                   | 2005/01/20-2005/01/27                                                                                                                                                       |
| Chen-Kung_ Univ                        | 23,0                   | 120,2                   | 2002/03/01-2002/05/14<br>2002/10/08-2003/04/12<br>2003/10/11-2004/04/25<br>2004/10/23-2005/05/30<br>2005/11/08-2006/05/22<br>2006/11/30-2007/07/10<br>2009/03/12-2012/07/03 |
| EPA-NCU                                | 25,0                   | 121,2                   | 2006/07/18-2012/10/25                                                                                                                                                       |
| Hangzhou-ZFU                           | 30,3                   | 119,7                   | 2007/08/08-2007/11/14                                                                                                                                                       |
| Hefei                                  | 31,9                   | 117,2                   | 2005/11/17-2005/12/20<br>2008/01/01-2008/05/07<br>2008/08/28-2008/11/20                                                                                                     |
| Jingtai                                | 37,3                   | 104,1                   | 2008/02/26-2008/05/01                                                                                                                                                       |
| Kaiping                                | 22,3                   | 112,5                   | 2008/10/09-2008/11/19                                                                                                                                                       |
| Lanzhou_City                           | 36,0                   | 103,9                   | 2009/10/02-2010-03/13                                                                                                                                                       |
| Liangning                              | 41,5                   | 122,7                   | 2005/04/06-2005/07/05                                                                                                                                                       |
| Lulin                                  | 23,5                   | 120,9                   | 2006/08/05-2012/12/22                                                                                                                                                       |
| Minqin                                 | 38,6                   | 103,0                   | 2010/05/18-2010/06/20                                                                                                                                                       |
| Muztagh_Ata                            | 38,4                   | 75,0                    | 2011/06/06-2011/12/11                                                                                                                                                       |
| NAM_CO                                 | 30,8                   | 91,0                    | 2006/08/06-2007/08/24<br>2009/01/27-2011/01/12                                                                                                                              |
| NCU_Taiwan                             | 25,0                   | 121,2                   | 2002/01/03-2003/12/05<br>2004/07/29-2005/12/20<br>2006/08/16-2006/10/25<br>2008/04/25-2009/09/26<br>2010/04/30-2011/06/10                                                   |

|                |      |       |                                                                                                                                                                                                                               |
|----------------|------|-------|-------------------------------------------------------------------------------------------------------------------------------------------------------------------------------------------------------------------------------|
|                |      |       | 2011/09/19-2012/05/14                                                                                                                                                                                                         |
| PKU_PEK        | 39,6 | 116,2 | 2006/08/14-2006/09/10<br>2008/07/21-2008/08/27                                                                                                                                                                                |
| QOMS_CAS       | 28,4 | 86,9  | 2010/09/30-2012/12/24                                                                                                                                                                                                         |
| SACOL          | 35,9 | 104,1 | 2006/07/28-2008/10/07<br>2009/03/03-2012/08/10                                                                                                                                                                                |
| Shouxian       | 32,6 | 116,8 | 2008/05/10-2008/12/25                                                                                                                                                                                                         |
| Taichung       | 24,1 | 120,5 | 2005/10/13-2005/11/07                                                                                                                                                                                                         |
| Taihu          | 31,4 | 120,2 | 2005/09/01-2009/05/31<br>2009/10/02-2010/09/24<br>2011/04/08-2010/10/04                                                                                                                                                       |
| Taipei_CWB     | 25,0 | 121,5 | 2002/10/19-2003/05/30<br>2003/10/21-2004/05/12<br>2004/11/04-2005/07/07<br>2005/10/06-2006/05/01<br>2006/12/11-2008/09/24<br>2009/01/11-2009/09/26<br>2010/02/27-2010/06/01<br>2001/02/22-2001/02/28<br>2001/05/21-2012/12/29 |
| XiangHe        | 39,8 | 117,0 | 2004/09/05-2012/05/18                                                                                                                                                                                                         |
| Xinglong       | 40,4 | 117,6 | 2006/02/19-2006/07/23<br>2007/10/26-2008/05/22<br>2009/07/31-2012/05/09                                                                                                                                                       |
| Yufa_PEK       | 39,3 | 116,2 | 2006/08/14-2006/09/09                                                                                                                                                                                                         |
| Yulin          | 38,3 | 109,7 | 2002/03/28-2002/10/31                                                                                                                                                                                                         |
| Zhangye        | 39,1 | 100,3 | 2008/04/11-2008/06/16                                                                                                                                                                                                         |
| Zhongshan_Univ | 23,1 | 113,4 | 2001/11/02-2012/07/09                                                                                                                                                                                                         |
